# Supplementary material for: Energy decomposition analysis method for metallic systems
Source: Royal Society of Chemistry journal article supplement (doi:10.1039/d1cp05112a), 2021-12-21
Supplement: d1cp05112a1.pdf [file d1cp05112a1.pdf]

## Supplementary Information

### Line-Search Method of Optimizing the Hamiltonian for Ensemble DFT

The Hamiltonian is optimized by a line-search algorithm in the space of Hamiltonian elements<sup>1</sup> for a fixed set of NGWFs. Let  $\tilde{\mathbf{H}}^{(m)}$  denote the Hamiltonian that is formed from the  $m$ -th electron density,  $n^{(m)}$ , whose molecular orbitals were in turn solved from a trial Hamiltonian,  $\mathbf{H}^{(m)}$ , as

$$\mathbf{H}^{(m)}\mathbf{M}^{(m)} = \mathbf{S}\mathbf{M}^{(m)}\boldsymbol{\varepsilon}^{(m)} \quad (1)$$

where  $\mathbf{H}^{(m)}$  and  $\tilde{\mathbf{H}}^{(m)}$  are the matrix representations of the corresponding Hamiltonians in NGWFs,  $\mathbf{S}$  is the overlap matrix of NGWFs,  $\mathbf{M}^{(m)}$  is the coefficient matrix for the molecular orbitals expanded in NGWFs, and  $\boldsymbol{\varepsilon}^{(m)}$  is the diagonal matrix of orbital energies. According to the line-search algorithm, the next Hamiltonian is determined by

$$\mathbf{H}^{(m+1)} = \mathbf{H}^{(m)} + \lambda\Delta^{(m)} \quad (2)$$

with the definition of

$$\Delta^{(m)} \equiv \tilde{\mathbf{H}}^{(m)} - \mathbf{H}^{(m)} \quad (3)$$

and  $\lambda$  is a damping parameter fitted against a polynomial such that the Helmholtz free energy is minimized<sup>1,2</sup>. Equation (2) can then be rewritten as

$$\mathbf{H}^{(m+1)} = (1 - \lambda)\mathbf{H}^{(m)} + \lambda\tilde{\mathbf{H}}^{(m)} \quad (4)$$

The line-search algorithm performs the iterations over  $m$  until the Liouville equation is satisfied when the commutator,  $[\tilde{\mathbf{H}}^{(m)}, \mathbf{K}^{(m)}]$ , attains zero, with the definition of the elements of the density kernel,  $\mathbf{K}$ , as

$$K^{ij} = \sum_k^{N_{\text{elec}}} M_{kf}^i f_k \left( \mathbf{M}^\dagger \right)_k^j \quad (5)$$

### Derivation of Weighted Orthogonalization

Weighted orthogonalization (WO) was developed by West<sup>3</sup> for orthogonalizing orbitals with arbitrary weights. Starting with  $\mathbf{P} = (|p_1\rangle |p_2\rangle \dots)$  as a nonorthogonal and normalized matrix of orbitals, it is preliminarily orthogonalized to yield  $\mathbf{Q}' = (|q'_1\rangle |q'_2\rangle \dots)$ , which is an intermediate matrix that is orthogonal. Transformation of  $\mathbf{Q}'$  to  $\mathbf{Q}$  is performed by sweeps of 2-by-2 rotations such that the weighted overlap sum, OVLPS, is maximized:

$$\text{OVLPS} = \sum_k w_k \langle p_k | q_k \rangle \quad (6)$$

where  $w_k$  is the weight associated with  $|p_k\rangle$ .  $\mathbf{Q}$  is the unknown and can be expressed in terms of the known intermediate matrix,  $\mathbf{Q}'$ . For a pair of orbitals, the rotation angle,  $\theta_{ij}$ , is evaluated from

$$\begin{pmatrix} |q_i\rangle & |q_j\rangle \end{pmatrix} = \begin{pmatrix} |q'_i\rangle & |q'_j\rangle \end{pmatrix} \begin{pmatrix} \cos \theta_{ij} & -\sin \theta_{ij} \\ \sin \theta_{ij} & \cos \theta_{ij} \end{pmatrix}^T \quad (7)$$

$$|q_i\rangle = |q'_i\rangle \cos \theta_{ij} - |q'_j\rangle \sin \theta_{ij} \quad (8)$$

$$|q_j\rangle = |q'_i\rangle \sin \theta_{ij} + |q'_j\rangle \cos \theta_{ij} \quad (9)$$

which can be multiplied by the nonorthogonal counterparts with weights to obtain the weighted overlap sum for the pair,  $\text{OVLPS}_{ij}$ :

$$\begin{aligned} \text{OVLPS}_{ij} &= w_i \langle p_i | q'_i \rangle \cos \theta_{ij} - w_i \langle p_i | q'_j \rangle \sin \theta_{ij} \\ &+ w_j \langle p_j | q'_i \rangle \sin \theta_{ij} + w_j \langle p_j | q'_j \rangle \cos \theta_{ij} \end{aligned} \quad (10)$$

Factoring by the trigonometric functions gives

$$\text{OVLPS}_{ij} = B_{ij} \cos \theta_{ij} + C_{ij} \sin \theta_{ij} \quad (11)$$

where

$$B_{ij} = w_i \langle p_i | q'_i \rangle + w_j \langle p_j | q'_j \rangle \quad (12)$$

$$C_{ij} = w_j \langle p_j | q'_i \rangle - w_i \langle p_i | q'_j \rangle \quad (13)$$

By using the trigonometric identity

$$\cos(\theta_{ij} - \gamma_{ij}) = \cos \theta_{ij} \cos \gamma_{ij} + \sin \theta_{ij} \sin \gamma_{ij} \quad (14)$$

the two terms in Equation (11) can be combined into one by multiplying Equation (14) with  $A_{ij}$  and comparing it:

$$\text{OVLPS}_{ij} = A_{ij} \cos(\theta_{ij} - \gamma_{ij}) \quad (15)$$

where

$$\cos \gamma_{ij} = \frac{B_{ij}}{A_{ij}} \quad (16)$$

$$\sin \gamma_{ij} = \frac{C_{ij}}{A_{ij}} \quad (17)$$

$$A_{ij} = \sqrt{B_{ij}^2 + C_{ij}^2} \quad (18)$$

$\text{OVLPS}_{ij}$  is maximized when  $\theta_{ij} = \gamma_{ij}$  in Equation (15).  $\cos \gamma_{ij}$  and  $\sin \gamma_{ij}$  are used to construct the rotation matrix in Equation (7) to determine  $|q_i\rangle$  and  $|q_j\rangle$ . Rotations occur in sweeps, where each sweep is a sequence of Equation (7) for all pairs of  $i$  and  $j$ , and the process repeats until convergence is attained<sup>4,5</sup>.

## Notes and references

- 1 C. Freysoldt, S. Boeck and J. Neugebauer, *Phys. Rev. B*, 2009, **79**, 241103.
- 2 N. Marzari, D. Vanderbilt and M. C. Payne, *Phys. Rev. Lett.*, 1997, **79**, 1337.
- 3 A. West, *Computational and Theoretical Chemistry*, 2014, **1045**, 73–77.
- 4 S. Rajasekaran and M. Song, *Journal of Parallel and Distributed Computing*, 2008, **68**, 769–777.
- 5 C. Sanderson and R. Curtin, *Journal of Open Source Software*, 2016, **1**, 26.
